# Supplementary material for: Food Industry Views on Pulse Flour—Perceived Intrinsic and Extrinsic Challenges for Product Utilization
Source: MDPI journal article supplement (doi:10.3390/foods11142146), 2022-07-20
Supplement: s1 [file s1]

**Supplementary Table:**

**Table S1.** Job titles targeted in the second distribution of the survey.

---

|                          |
|--------------------------|
| Business Development     |
| CEO                      |
| Chief Marketing Officer  |
| Director                 |
| Engineering/Technical    |
| Executive                |
| Executive Director       |
| Executive Officer        |
| Executive Vice President |
| General Manager          |
| International            |
| Manager                  |
| Manufacturing            |
| Manufacturing Executive  |
| Marketing                |
| Marketing Executive      |
| Operations               |
| Operations Executive     |
| Owner                    |
| President                |
| Principal                |
| Purchasing Executive     |
| Regional Manager         |
| Sales                    |
| Sales Executive          |
| Senior Vice President    |
| Site Manager             |
| Vice President           |

---
